# **Hierarchical transcriptional control regulates *Plasmodium falciparum* sexual differentiation**

Riëtte van Biljon<sup>1</sup>, Roelof van Wyk<sup>1</sup>, Heather J. Painter<sup>2</sup>, Lindsey Orchard<sup>2</sup>, Janette Reader<sup>1</sup>, Jandeli Niemand<sup>1</sup>, Manuel Llinás<sup>2,3</sup>, Lyn-Marie Birkholtz<sup>1#</sup>

<sup>1</sup> Department of Biochemistry, Genetics and Microbiology, Institute for Sustainable Malaria Control, University of Pretoria, Private Bag x20, Hatfield 0028, South Africa

<sup>2</sup> Department of Biochemistry & Molecular Biology and the Huck Center for Malaria Research and <sup>3</sup>Department of Chemistry, Pennsylvania State University, University Park, PA, 16802, USA

# Corresponding author Tel.: +27 12 420 2479; fax: +27 12 362 5302. E-mail address:

[lbirkholtz@up.ac.za](mailto:lbirkholtz@up.ac.za)

## Abstract

Although malaria is characterized by cyclic waves of infection by asexual parasites, only sexual gametocyte forms of the malaria parasite can be transmitted between the infected human and the mosquito host. Here we provide a high-resolution transcriptome of *P. falciparum* as it commits to and develops through gametocytogenesis and prepares for transmission to the mosquito vector. As anticipated, the gametocyte-associated transcriptome is significantly different from that of the asexual blood cycle, and a dynamic shift in gene expression characterizes early, intermediate and late-stage gametocyte development. Moreover, we show a differential timing in the expression of sex-specific transcripts and we highlight early male and female gametocyte markers for functional evaluation. The striking temporal transcript abundance profiles suggest that strict transcriptional control underlies the 10-day gametocyte developmental program in *P. falciparum*. We identify putative regulators of transcriptional dynamics, including epigenetic mechanisms driving active repression of processes typically associated with proliferation and ApiAP2 transcription factors expressed during gametocyte maturation. The gametocyte transcriptome serves as the blueprint for sexual differentiation at the mRNA transcript level and will be a rich resource for future functional studies on this critical stage of *Plasmodium* development, as the intraerythrocytic transcriptome has been for our understanding of the 48-hour asexual cycle.

## Author Summary

The ability of the malaria parasite *Plasmodium falciparum* to smoothly transition between the human and the female mosquito hosts is one of the hallmarks of the pathogenicity of the disease. Only sexually dimorphic, mature gametocyte stages of the parasite life cycle can complete the human-to-mosquito transmission task. However, we do not clearly understand how these gametocytes develop and mature. Here, we report the highest resolution investigation of the gametocyte's transcriptional profile during development and differentiation. This information sheds light on several possible regulators that mediate parasite maturation into transmission-competent stage V gametocytes. We find that 15% of the parasite's transcripts are developmentally regulated within three distinct phases of sexual development, each corresponding to essential biological events allowing for regulated and staged differentiation. Our study lays the foundation for future projects aiming to therapeutically target these transmissible stages and comprises an invaluable resource for the study of malaria parasite pathogenesis.

## Introduction

Sustained malaria prevalence is ensured through continued human-to-mosquito transmission of *Plasmodium* parasites with *Plasmodium falciparum* being the causative agent of the most severe form of the disease in humans (1). The complex life cycle of *P. falciparum* encompasses development in the liver and erythrocytes of its human host and transmission by the female *Anopheline* mosquito. Two distinct developmental phases characterize intraerythrocytic development: rapid, cyclic asexual cell division manifesting in pathology, and the stochastic (<10%) sexual differentiation into gametocytes (2,3), which produces the non-replicative, mature, transmissible forms of the parasite. Whilst the intraerythrocytic developmental cycle (IDC) is relatively rapid (~48 h) and results in massive cell number expansion, sexual differentiation and development (gametocytogenesis) is a prolonged process (~10 days) in *P. falciparum* and is characterized by the development of the parasite through five morphologically distinct gametocyte stages (stages I-V) (4).

The processes of asexual replication and sexual differentiation in *Plasmodium* are associated with distinct patterns of gene expression that are tightly controlled through complex regulatory systems (5). These patterns have been investigated to some extent for asexual replication where *P. falciparum* parasites use both transcriptional (6–8) and post-transcriptional processes (9,10) to effect a cascade of coordinated, stage-specific gene expression (11,12). Despite the identification of some putative regulators of gene expression, including the Apicomplexan-specific ApiAP2 family of transcription factors (13–15) and epigenetic regulation of particular gene families (16,17), the specific mechanisms controlling transcriptional activation in the parasite

are incompletely understood, with recent data clearly showing mRNA dynamics are also influenced by additional post-transcriptional mechanisms (18,19).

The mechanisms regulating commitment to gametocytogenesis have been somewhat clarified recently, with the discovery of host LysoPC restriction acting as an environmental factor driving gametocyte commitment (20). The AP2-G transcription factor acts as a molecular master switch of sexual commitment (21–24) and results in the expression of genes that drive entry into gametocytogenesis (22–26). The *ap2-g* gene is released from an epigenetically silenced state (27,28) through the antagonism of heterochromatin protein 1 (HP1) epigenetic silencing of the *ap2-g* locus by the gametocyte development protein 1 (GDV1). (29). Commitment to gametocytogenesis further requires stabilization of a subset of gametocyte-specific transcripts (18).

Despite these advances toward unravelling the mechanisms of commitment, the molecular functions governing subsequent gametocyte development and maturation remain poorly understood. Previously, deletion of certain ApiAP2 proteins has been shown to prevent progression of gametocyte development in the rodent parasite *P. berghei* (30) and *P. falciparum* (31). Further, a subset of transcripts are translationally repressed by RNA binding proteins such as the Pumilio family protein (PUF2) during gametocytogenesis and ATP-dependent RNA helicase DDX6 (DOZI) and trailer hitch homolog (CITH) that repress female gametocyte transcripts needed to complete gametogenesis (32,33). However, systematic exploration of gene expression for *P. falciparum* gametocytogenesis has been limited to evaluation of the transcriptome (34–38) and proteome (35,39–41) at specific developmental timepoints. This includes

the bifurcation in committing asexual parasites to gametocytogenesis (18,20,25), and evaluation of mature gametocytes in preparation for transmission (35,40,41). Current datasets that evaluate the complete gametocyte development process are sparse (36) and preclude dynamic evaluation of the transcriptomic profile associated with the extended gametocyte development process of *P. falciparum* parasites. Therefore, a time-resolved, high-resolution dataset capturing the transcriptome of each stage of gametocyte development would greatly enhance our ability to compare gene expression levels throughout the 10 days of gametocyte development and maturation.

Here we describe a comprehensive transcriptome analysis of *P. falciparum* parasites during all stages of sexual development at daily resolution. By measuring transcript abundance pre- and post-commitment, the transcriptional profile of gametocytes can be completely distinguished from that of asexual parasites. The data show marked shifts in transcript abundance associated with morphological stage transitions, indicating that gene expression occurs on a time scale consistent with developmental decisions underlying gametocyte development. We also show that post-commitment, the gametocyte transcriptome is shaped by specific epigenetic marks and ApiAP2 transcription factors. The gametocyte transcriptome provides a quantitative baseline of gene expression throughout sexual development and constitutes a highly valuable resource that could be exploited to further understand the molecular mechanisms governing sexual differentiation and maturation of the malaria parasite.

## Results

### Transition between sexual and asexual stages of development defined by transcriptome

*P. falciparum* NF54-*pfs16*-GFP-Luc (42) parasites were induced to form gametocytes after 1.5 cycles of asexual development (3 days) and monitored for the next 13 days to capture gametocyte commitment and development to mature stage V gametocytes (Fig 1A). Tight synchronization of the asexual parasites ensured coordinated gametocyte development, and gametocytes (stage I) were observed in culture from day 0 onwards (Fig 1B). Morphological evaluation showed a shift from a predominantly asexual parasite population to >60% gametocytes by day 3 of gametocytogenesis following the removal of asexual stages (Fig 1B).

We measured mRNA abundance genome-wide using DNA microarrays at daily intervals, capturing expression values for 96-99% of the 5443 genes measured per timepoint ( $P < 0.01$ , S1 Table). Overall, the transcriptome of gametocytes is distinct from asexual parasites, as is evidenced by a clear shift in Pearson correlation between the transcriptomes of asexual parasites (day -2 to 2) and gametocytes (day 3 onward) (Fig 1C). Populations containing predominantly asexual parasites (days -2 to 2) were highly correlated across the first two 48 h cycles ( $r^2 = 0.54-0.86$ , S2 Table) and were characterized by periodic gene expression changes between the asexual ring and trophozoite stages (Fig 1C). From day 3 onward, the transcriptional profiles diverged indicating a switch from asexual to sexual development, evidenced by a loss of the 48 h correlation pattern (Fig 1C). During subsequent days of gametocytogenesis, peak correlations were associated with developmental progression through stage I-II (days

3-5,  $r^2=0.56-0.73$ ), stage III-IV (days 6-9,  $r^2=0.51-0.92$ ), and mature stage V gametocytes (days 10-13,  $r^2=0.50-0.84$ ) (Fig 1C, S2 Table).

Progression from asexual to sexual development was also clearly detectable in the expression profiles of individual genes required during asexual development (e.g. *kahrp* (*pf3d7\_0202000*)) while sexual genes were only expressed during gametocyte development from day 3 (43) (Fig 1D). The genes restricted to expression during sexual development include downstream targets of PfAP2-G (23) and markers associated with mature gametocyte sex-specificity (Fig 1D) (35) and 24 novel gametocyte-associated transcripts (S2 Table). Among these transcripts were a putative ncRNA, three rRNAs and two tRNAs, suggesting that the expression of non-coding RNAs may not only play a role during gametocyte commitment (18) but also in gametocyte development and maturation in *P. falciparum*. Together, these data comprise a high-resolution *P. falciparum* blood stage developmental transcriptome that allows for the temporal evaluation of transcriptional abundance patterns associated with gametocyte commitment, development and maturation.

## **The gametocyte-specific transcriptional program reflects the molecular landscape of gametocyte development**

To associate temporal gene expression to particular events during gametocyte commitment and stage transitions throughout development, the full 16-day transcriptome dataset was K-means clustered revealing 2763 transcripts with overall decreased abundance (clusters 1-5) and 2425 with increased abundance during gametocytogenesis (clusters 6-10, Fig 2A). Therefore, gametocytogenesis relies on a



more specialized program of gene expression compared to asexual development, with only 45% of transcripts showing increased abundance during gametocyte development (Fig 2A) compared to the 80-95% of transcripts increased during specific phases of asexual development (11,19,44). Interestingly, individual clusters showed specific patterns of gene expression throughout gametocyte development (Fig 2A), with transcript abundance during gametocytogenesis either decreased following asexual development (clusters 1-3, 1042 transcripts); maintained (clusters 4-5, 1721 transcripts) or increased (cluster 6-7, 1571 transcripts). Three clusters (clusters 8-10) show transcripts with specific peaks in expression evident during development, indicative of developmental regulation.

Cluster 1 is predominantly comprised of critical asexual stage transcripts which showed a decline in abundance during gametocytogenesis, with up to 5 log<sub>2</sub> fold decreases in the expression of these transcripts between the ring and early gametocyte stages (Fig 2A). These transcripts include Maurer's cleft proteins *e.g.* *rex1* (*pf3d7\_0935900*) and *rex2* (*pf3d7\_0936000*) as well as knob associated proteins that form part of the cytoadherence complex (*kahrp* (*pf3d7\_0202000*), *kahsp40* (*pf3d7\_0201800*)), supporting earlier observations that the gametocytes mediate sequestration via different mechanisms than asexual parasites (45). Many of these cytoadherence associated transcripts are associated with heterochromatin protein 1 (HP1) occupancy during gametocyte development (46), and other HP1 (46,47) and H3K9me3 (17) repressed genes are also significantly enriched in cluster 1 ( $P < 0.0001$ , Fisher's exact test, genes listed in S3 Table). This suggests asexual development-specific genes are actively repressed by epigenetic regulation throughout gametocyte development. Clusters 1-3 also contain transcripts involved in metabolic processes

that are not critical to gametocyte development including genes encoding for enzymes of heme metabolism and glycolysis (Fig 2B, cluster 3, S1 Table) as well as regulators of egress (*pkg* (*pf3d7\_1436600*)) and invasion (*bdp1* (*pf3d7\_1033700*) and *ap2-i* (*pf3d7\_1007700*)), all processes that are not necessary for gametocyte maturation (Fig 2A, cluster 2). Beyond these examples, clusters 1-3 also contain 214 unannotated genes that could be specifically required for asexual development only (Fig 2B).

Some transcripts show low abundance throughout gametocytogenesis (Fig 2A, clusters 4 and 5, average expression  $<0.1 \log_2(\text{Cy5/Cy3})$ , with amplitude change  $<0.5 \log_2(\text{Cy5/Cy3})$ ). These clusters include regulators of proliferation (e.g. origin of replication complex protein *mcm4* (*pf3d7\_1317100*), proliferating cell antigen 1 (*pf3d7\_1361900*) and cyclin dependent kinase *crk4* (*pf3d7\_0317200*)). By comparison, clusters with transcripts maintained at increased levels throughout commitment and development (Fig 2A, clusters 6 and 7, average  $\log_2(\text{Cy5/Cy3}) > 0.31$ ) included expected gene sets involved in the constitutive processes of macromolecular metabolism (e.g. DNA replication, protein modification and RNA metabolism Fig 2B, S1 Table) (36,38). Interestingly, cluster 6 (and cluster 2) showed a high degree of cyclic oscillation in transcript abundance (Fig 2A). Many of these transcripts relate to transport, general cellular metabolism and homeostasis, functions in which fluctuation would not be unexpected (Fig 2B, S1 table). Importantly, cluster 7 also contained transcripts classified by gene ontology as involved in cellular differentiation (*caf40* (*pf3d7\_0507600*), *pf3d7\_0918400*, *pf3d7\_0926800* and *speld* (*pf3d7\_1137800*)) (GO:0030154,  $P=0.026$ , Fig 2B, S1 Table).

224 A significant proportion (15%) of the transcriptome associated with peak expression  
 225 during specific stage-transitions in gametocyte development (Fig 2A, clusters 8-10),  
 226 reminiscent of the phased expression typical of the asexual transcriptome (11,12).  
 227 Transcripts involved in early-stage development increased from stage I-II in cluster 8  
 228 in a transcriptional profile often associated with targets of AP2-G (22,23,25).  
 229 Transcripts in cluster 9 increased in abundance in the intermediate phase of  
 230 development (stage III-IV) before the expression of transcripts required for  
 231 development in mosquitoes in cluster 10 (stage V, *gamer* (*pf3d7\_0805200*), *mtrap*  
 232 (*pf3d7\_1028700*), *cht1* (*pf3d7\_1252200*), Fig 2A &B). The transcripts in clusters 8-10  
 233 are thus markers of biological transitions during gametocyte development. Clusters 6  
 234 & 8 are enriched for genes that contribute to the metabolic shift to mitochondrial  
 235 metabolism (e.g. malate dehydrogenase (*mdh*, *pf3d7\_0618500*)) and fatty acid  
 236 biosynthesis (e.g.  $\beta$ -ketoacyl-ACP synthase III (*kasIII*, *pf3d7\_0618500*)) (48,49) in  
 237 gametocytes, followed by the emergence of processes related to cytoskeletal  
 238 formation (clusters 8 & 9, Fig 2A &B, Table S1) that lead to the construction of a rigid  
 239 subpellicular microtubule array during the sequestering stages (stages I-IV) of  
 240 gametocytes (50). The microtubule array results in the characteristic crescent shape  
 241 of the intermediate stages before the complex depolymerizes in stage V that is  
 242 accompanied by the increased transcript abundance of actin depolymerization factors  
 243 1 and 2 (Fig 2A, cluster 10, *pf3d7\_0503400*, *pf3d7\_1361400*) to allow for a more  
 244 deformable erythrocyte that can re-enter circulation (50). This cluster also includes the  
 245 genes encoding the serine repeat antigens (*sera*) 3 and 5 (*pf3d7\_0207800*,  
 246 *pf3d7\_0207600*) that play a role in egress in asexual parasites (51,52), implying that  
 247 they may retain this role during gametocyte egress from the erythrocyte in the  
 248 mosquito midgut. The striking temporal patterns of transcript abundance in clusters 8-

10 suggests strict transcriptional regulation of these genes to ensure the timing of gametocyte sequestration, circulation and egress. Interestingly, these patterns are exhibited by parasites that need not fulfil any of these functions when grown *in vitro* in the absence of host-interactions, suggesting that transcription of these genes is hard-wired.

## **Different regulatory modules enable sexual commitment and development**

The time-resolved gametocyte transcriptome also allows interrogation of the expression of genes involved in sexual commitment throughout gametocyte development (18,20,25) (Fig 3). In total, previous reports produced a set of 1075 unique genes proposed to function as an “on switch” that characterizes gametocyte commitment (18,20,25). Of these, 680 genes (63%) also have increased transcript abundance during gametocyte development (Fig 3). These increased transcripts include those encoding epigenetic regulators involved in cell cycle control such as SIR2A (PF3D7\_1328800) and SAP18 (PF3D7\_0711400) that contribute to decreased DNA synthesis and a block in proliferation (53,54) necessary for the parasite to differentiate (Fig 3A). The remaining 395 transcripts are not increased in abundance during gametocyte development, suggesting that these transcripts are short lived and possibly only essential during gametocyte commitment. These short lived transcripts include *gdv1*, whose protein product prevents epigenetic repression of *ap2-g* during commitment (29), and *iswi* and *sn2fl*, which encode chromatin remodelling proteins (Fig 3A), that are expressed in sexually committed cells downstream of *ap2-g* (25). From our data we also identified a specific 5' *cis*-regulatory motif (AGACA) that is enriched upstream of 539 genes with increased transcript abundance throughout

gametocytogenesis (Fig 3B, S3 Table), suggesting that transcriptional regulation of genes containing this motif could be important for gametocyte development. This AGACA motif has been associated with sexual commitment and development in previous datasets (18,55). In addition, a second motif (ATGTGTA) was also highly over-represented in the transcripts with increased abundance throughout gametocytogenesis (Fig 3B, S3 Table). This motif has been correlated with genes involved in DNA replication (56) and the significance of this enrichment in genes associated with differentiation is unclear and their *trans*-acting factors have not been identified (15,57).

## **Transcriptional patterns characterize distinct transitions in gametocyte development**

Apart from commitment to sexual development, the parasite also undergoes distinct developmental and transcriptional transitions during gametocyte development. The initial transition occurring in stage I gametocytes and regulating immature gametocyte development is characterised by increased transcript abundance in cluster 8 (Fig 4A), which showed a significant enrichment for genes involved in regulation of transcription (GO:0010468, 11 transcripts,  $P=0.029$ ) including the specific ApiAP2 transcription factors *pf3d7\_0404100*, *pf3d7\_0516800*, *pf3d7\_1429200* and the *myb1* transcription factor (*pf3d7\_1315800*) (Fig 4A). Other genes with potential regulatory functions include a possible novel transcription factor, *pf3d7\_0603600*, which contains an AT-rich interaction domain (IPR001606: ARID) and an uncharacterized RNA binding protein (*pf3d7\_1241400*). Proteins expressed by these two genes have been detected previously during gametocyte development (Fig 4A) (34,35,40,41). These proteins,

along with the C-Myc binding protein MYCBP (PF3D7\_0715100), are of interest for further study to determine their role in controlling gene expression during gametocyte development.

A second outcome of the initial transition into gametocytogenesis is the determination of sex differentiation in *P. falciparum* parasites, which is proposed to be an PfAP2-G independent process that occurs at the very onset of commitment (18,35,40,41,58). However, sexually dimorphic gametocytes are only morphologically detectable by microscopy from stage III onwards (59). Our data indicate that the male-enriched transcripts from Lasonder *et al.* 2016 (35) show increased abundance earlier in development (stage I-II; 27% of cluster 8,  $P < 0.0001$ , two-tailed Fisher's exact test, Fig 4B, S3 Table) compared to female transcripts. This observation is particularly interesting given the low ratio of male to female gametocytes in mixed populations (60), which suggests the rapid increase in male-enriched transcript abundance may be important for promoting male gametocyte development. These 98 male-enriched transcripts include 3 genes containing putative RNA binding motifs (*pf3d7\_1126800*, *pf3d7\_0414500*, *pf3d7\_1438800*) that are highly abundant from stage I onwards, suggesting that these transcripts may be good biomarkers of early male differentiation as an alternative to  $\alpha$ -tubulin II, which is expressed promiscuously in early gametocyte populations (61). Other male transcripts code for a meiotic protein (PF3D7\_1311100), MGET (PF3D7\_1469900), PF3D7\_1010400 and P25A (PF3D7\_1236600), which increase in abundance following the initial transcripts.

Female-enriched transcripts (35) peak in abundance only after sexual dimorphism is clearly discernible, from stage II-III onwards (Fig 4B) and are significantly overrepresented in the intermediate development cluster 9 (Fig 4B, S3 Table, 76% of the cluster,  $P < 0.0001$ , two-tailed Fisher's exact test). Overall, this trend held true for the 158 female-enriched transcripts in cluster 9, including those encoding canonical female markers, e.g. osmiophilic body protein *g377* (*pf3d7\_1250100*) (62,63), late-stage antigen *pfs25* (*pf3d7\_1031000*) (35,63) and *ccp1-3* (*pf3d7\_1475500*, *pf3d7\_1455800*, *pf3d7\_1407000*) (35,63) and *ccp4* (*pf3d7\_0903800*) that was recently used to reliably type male and female gametocytes in late-stage gametocytes (64). We also detect a small subset of female-enriched transcripts (*pf3d7\_0918700*, *imp2* (*pf3d7\_0730400*), *pf3d7\_1007800*, *pf3d7\_1466800*, *pf3d7\_1146800*, *obc13* (*pf3d7\_1214800*)) that are expressed earlier in gametocyte development (Fig 4B) and could potentially be important for female development before morphological differences are apparent.

The second transcriptional transition we observed coincides with the onset of gametocyte maturation from stage IV to V (Fig 4C). These transcripts show increased abundance in sexually committed asexual parasites as well as mature stage V gametocytes but have diminished abundance during the early and intermediate stages of gametocytogenesis (cluster 10, Fig 4C). This cluster was significantly enriched for transcripts stabilized during commitment (47% of transcripts,  $P < 0.0001$ , two-tailed Fisher's exact test) (18), as well as genes marked with H3K36me3 in asexual parasites (49%  $P < 0.0001$ , Fisher's exact test) (16). Interestingly, the epigenetic H3K36me3 mark is abundant during the intermediate stages of gametocyte development (65) and genes overlapping in the three datasets encode transcripts associated with the



intracellular signalling machinery of the parasite (*cdpk1* (*pf3d7\_0217500*), *cdpk5* (*pf3d7\_1337800*) and adenylyl cyclase beta (*pf3d7\_0802600*, (66)), along with cAMP-dependent protein kinase A catalytic and regulatory subunits (*pkac* (*pf3d7\_0934800*), *pkar* (*pf3d7\_1223100*) (Fig 4C). Of these, CDPK1 has been confirmed to function in de-repressing female gametocyte transcripts during parasite development in mosquitoes (67). Several of the genes in cluster 10 also have roles in invasion including the merozoite proteins *msp1*, *pf3d7\_0930300*, *msp2*, *pf3d7\_0206800*, *rh4*, *pf3d7\_0424200*, and *rh5*, *pf3d7\_0424100*, suggesting that invasion genes need to again be expressed for transition to gametogenesis in the mosquito. Overall, the gametocyte transcriptome reveals three major stages in gametocyte development (differentiation (Fig 4A), intermediate development (Fig 4B), maturation (Fig 4C)) that promote gametocyte development of *P. falciparum* parasites.

## **ApiAP2 transcription factors are expressed at specific intervals during gametocytogenesis**

To investigate the possible contribution of factors associated with transcriptional regulation to the observed stage-progressions during gametocytogenesis, we interrogated the expression of the genes encoding the ApiAP2 transcription factor family (Fig 5). Of the 27 family members, 15 genes encoding ApiAP2 transcription factors increased in transcript abundance during gametocyte development. Transcript abundance for *pf3d7\_0404100*, *pf3d7\_1350900*, *pf3d7\_1449500*, *pf3d7\_0802100*, *pf3d7\_1429200* increased consistently throughout the time course (S1 Fig). However, most ApiAP2-encoding transcripts increased in abundance at discrete intervals (Fig 5A) throughout gametocytogenesis. As expected, *ap2-g* (*pf3d7\_1222600*) transcript



abundance increased before the appearance of gametocytes (days -1 to 2). The target genes bound by AP2-G (23), peaked in transcript abundance directly following AP2-G peak abundance as expected, coinciding with stage I of gametocyte development (S2 Fig). Thereafter, three transcription factors *pf3d7\_1408200*, *pf3d7\_1317200* and *pf3d7\_0611200* were increased during stage I to III of development (days 2-6). In the rodent-infectious malaria parasites *P. berghei* and *P. yoelii*, orthologs of the first two genes have been associated with gametocyte development through knockout studies (21,30). Three ApiAP2-encoding transcripts for *pf3d7\_0516800*, *pf3d7\_1222400*, *pf3d7\_0934400* were increased in abundance from stage I to V of development (Fig 5A), following a pattern similar to the increased abundance of cluster 8 (Fig 4A). During the later stages, *pf3d7\_1143100*, *pf3d7\_1239200* and *pf3d7\_0613800* were increased in abundance. Expression of PF3d7\_1143100 is translationally repressed in *P. berghei* gametocytes (32), indicating that these transcription factors may not contribute to gene expression in *P. falciparum* gametocytes, but may instead have functional significance in subsequent development in the mosquito.

To associate functional regulation of gene sets due to the cascade-like increased abundance of the transcripts encoding the ApiAP2 transcription factors, the gametocyte transcriptome was analysed using Gene Regulatory Network Inference Using Time Series (GRENITS (68)) (S3 Table) with the strongest predicted regulators shown in Fig 5B. From this analysis, *pf3d7\_0611200*, which increased in abundance directly following *ap2-g*, coexpressed with 314 genes (probability linkage >0.6), 223 of which were anti-correlated for expression and functionally enriched for genes involved in host invasion (GO:0044409: entry into host,  $P=2.97e^{-12}$ ; Fig 5B). The large proportion of genes putatively repressed by this transcription factor would point to

*pf3d7\_0611200* acting as a repressive ApiAP2 transcription factor during gametocyte development, either alongside or instead of the *P. falciparum* ortholog of *pbap2-g2*, *pf3d7\_1408200*. The second *apiap2* transcript increased in abundance, is *pf3d7\_1317200*, the *P. falciparum* ortholog of *pbap2-g3*, coexpressed with 21 genes involved in cell cycle processes, including DNA replication (GO:0044786,  $P=0.0061$ ) and chromosome organization (GO:0051276  $P=0.0046$ ). This ApiAP2 transcription factor has been previously associated with gametocyte development (31,69) and could be an important driver of stage II-III development. The two final ApiAP2 transcription factors are increased between stage I-V of development, with the first, *pf3d7\_0934400*, showing mostly negative co-expression with its target genes (27/37 transcripts, including *pkg* and *ptex88* (*pf3d7\_1105600*)), suggesting this ApiAP2 transcription factor might also act as repressor. Secondly, the transcript of *ap2-o2* is increased in abundance throughout development but peaks at stage IV (day 8-9) of development and was predicted to regulate 22 target genes. Taken together, this data supports the involvement of successive expression of ApiAP2 transcription factors in a regulatory cascade during gametocyte development, as has been proposed for *P. berghei* gametocytes (21) and shows that this subsequent expression co-occurs with stage transition during *P. falciparum* gametocytogenesis.

## Discussion

We describe a high-resolution gametocyte transcriptome of malaria parasite differentiation from the asexual form through sexual commitment and all stages of development to mature stage V gametocytes. We find that gametocytogenesis in *P. falciparum* is a well-controlled process involving successive activation of regulatory processes that mediate development during stage-transition, ultimately resulting in a parasite poised for transmission. These observations emphasize that stage-specific gene expression is an essential feature of regulation of gene expression in *Plasmodium* spp. and is particularly true for the extended and morphologically diverse gametocyte development of *P. falciparum* parasites. The dynamic evaluation of the transcriptome allows for the construction of a more complete molecular roadmap for gametocyte development (Fig 6).

We propose that multiple transition points are passed during sexual differentiation and that mechanisms independent of initial sexual commitment during asexual proliferation are needed to ultimately result in completion of gametocyte development. First, committed parasites pass an initial transition point, whereby processes are initiated to drive early gametocyte development. This includes repression of genes typically associated with proliferation through epigenetic mechanisms (H3K9me3, HP1 occupancy), post-transcriptional regulation (18) and the activity of transcription factors that repress asexual-specific transcription (Fig 6). This transition point is also characterized by the increased transcript abundance of genes required during early and intermediate gametocyte development. A portion of these transcripts are expressed specifically in either sex, with an apparent delay between the peak

abundance of male-specific and female-specific transcripts (Fig 6). It is possible that tracing the transcriptional dynamics within each sex separately would result in higher resolution data for this observation and resolve whether this is a true delay or underplayed by more complicated transcriptional dynamics that impact the RNA biology of the disparate sexes. As the gametocyte then reaches the critical transition for its pathology, the point of gametocyte maturation, a different set of genes increase in abundance. These genes are active in important processes specific to maturation into stage V gametocytes, including the switch from sequestration in the bone marrow to re-entering circulation and readying for transmission to the mosquito by involving the parasite's intracellular signalling machinery.

A particularly interesting observation is the decreased abundance of important regulators of commitment, *ap2-g* and *gdv1*, as the parasite enters the early gametocyte stages (Fig 6). It is possible that the limited activity of these regulators might be essential for gametocytogenesis to occur normally, to allow the distinct patterns of gene expression we see here. It would be of interest to test what the effect of overexpression of one or both of these factors would be on gametocyte development. We also add to data on the transcriptional regulation in *P. falciparum* by the ApiAP2 transcription factor family downstream of AP2-G, affirming the presence of a transcription factor cascade enabling passage through gametocytogenesis as postulated for *P. berghei* (21). The involvement of *ap2-g2* and *pf3d7\_0611200* in repressing transcription of asexual genes during gametocyte development (Fig 6) is also of particular interest for investigation, bringing into question if one or both of these factors fulfil this role in *P. falciparum* gametocytes. However, the possibility of novel regulators of transcription in early gametocyte development cannot be overlooked,

with RNA binding proteins and the possible ARID transcription factor (Fig 6) good candidates for functional characterization.

The high-resolution transcriptome profile of *P. falciparum* gametocytes offers a complete molecular landscape of parasite differentiation. We identify putative regulators of mRNA dynamics facilitating a well-timed transcriptional program that prepares the parasite for transmission. The profile provides molecular identity to differences and similarities in asexual and sexual development that can be exploitable for pharmaceutical intervention. Finally, the stage-specific events that complicate transmission-blocking drug discovery are highlighted, 1) the immediate divergence of the gametocyte's molecular profile from asexual development, 2) the later sexual dimorphism in intermediate stage development and 3) the apparent transcriptional divergence between immature and mature gametocytes. The gametocyte transcriptome further provides a valuable resource for further interrogation of the function of gene products and regulatory mechanisms important for gametocytogenesis in *P. falciparum*.

## Experimental Procedures

### Parasite culturing and sampling

Asexual *P. falciparum* NF54 parasite cultures (NF54-*pfs16*-GFP-Luc,(42)) were maintained at 5-8% parasitemia 37°C in human erythrocytes at 5% hematocrit in RPMI 1640 medium supplemented with 25 mM HEPES, 0.2 % D-glucose, 200 µM hypoxanthine, 0.2% sodium bicarbonate, 24 µg/ml gentamicin with 0.5 % AlbuMAX® II and incubated under hypoxic conditions (90% N<sub>2</sub>, 5% O<sub>2</sub>, and 5% CO<sub>2</sub>)(70). Synchronous asexual cultures (>95% synchronized ring-stage parasites) were obtained by three consecutive cycles of treatment with 5% D-sorbitol, each 6-8 h apart. Gametocytogenesis was induced by employing a strategy of concurrent nutrient starvation and a decrease of hematocrit(70). Ring-stage parasite cultures were adjusted to a 0.5% parasitemia, 6% hematocrit in RPMI 1640 medium prepared as for growth of asexual parasites without additional glucose supplementation (day -3) and maintained under the same hypoxic conditions at 37°C without shaking. After 72 h, the hematocrit was adjusted to 3% (day 0). After a further 24 h, induction medium was replaced with medium containing 0.2% (w/v) D-glucose as the asexual parasites were removed daily with 5% D-sorbitol treatment for 15 minutes at 37°C and/or *N*-acetylglucosamine included in the culture medium for duration of the sampling. All cultures were maintained with daily medium changes and monitored with Giemsa-stained thin smear microscopy and parasite stage distribution determined by counting ≥ 100 parasites per day. Parasite samples (30 ml of 2-3% gametocytemia, 4-6% hematocrit) were harvested daily for microarray analysis on days -2 to 13 following gametocyte induction. The samples harvested on days -2 to 7 were isolated from uninfected erythrocytes via 0.01% w/v saponin treatment for 3 minutes at 22°C while

samples from day 8 to 13 were enriched for late stage gametocytes via density centrifugation using Nycoprep 1.077 cushions (Axis-Shield). Late stage gametocyte samples were centrifuged for 20 min at 800xg and the gametocyte containing bands collected(70). All parasite samples were washed with phosphate-buffered saline before storage at -80°C until RNA was isolated.

## **RNA isolation, cDNA synthesis and microarray hybridization and scanning**

Total RNA was isolated from each parasite pellet with a combination of TRIzol (Sigma Aldrich, USA) treatment and using a Qiagen RNeasy kit (Qiagen, Germany) as per manufacturer's instructions. The quantity, purity and integrity of the RNA were evaluated by agarose gel electrophoresis and on a ND-2000 spectrophotometer (Thermo Scientific, USA). For each RNA sample, 3-12 µg total RNA was used to reverse transcribe and dye couple cDNA as described previously (71). The reference cDNA pool was constructed from a mixture of all the gametocyte samples used in the experiment in a 1:4 ratio with cDNA from a 6-hourly time course of asexual *P. falciparum* 3D7 parasites. For microarray hybridization, equal amounts of cDNA between 150 and 500 ng of Cy5 labeled sample and Cy3 labeled reference pool were prepared for hybridization as described previously (71). Arrays were scanned on an Agilent G2600D Microarray Scanner (Agilent Technologies, USA) with 5 µm resolution at wavelengths of 532 nm (Cy3) and 633 nm (Cy5). Linear lowess normalized signal intensities were extracted using the Agilent Feature Extractor Software version 11.5.1.1 using the GE2\_1100\_Jul11\_no\_spikein protocol and data was uploaded onto the Princeton University Microarray Database (<https://puma.princeton.edu/>).

## **Data analysis**

Signal intensities loaded on the Princeton University Microarray Database were filtered to remove background and unsatisfactory spots were flagged for removal using spot filters  $P < 0.01$  and  $\log_2$  (Cy5/Cy3) expression values were used for further analysis. Euclidean distance clustered heatmaps were generated using TIGR MeV software version 4.9.0 (<http://www.tm4.org/mev.html>). The R statistical package (version 3.3.2) was used to calculate Pearson correlation coefficients and these were visualized using the Corrplot package.

For functional analysis of genes, gene ontology enrichments were obtained for biological processes with  $P < 0.05$  using curated evidence using PlasmoDB Release v 33 (<http://www.plasmodb.org/>) and supplemented with annotation from MPMP (66) and Interpro (<https://www.ebi.ac.uk/interpro/>). Additional supplementary datasets for translationally repressed genes (33,35), transcripts involved in commitment (18,20,25) and gametocyte transcriptomes and proteomes (35,39–41) were probed for significant association with clusters of expression using a two-tailed Fisher's exact test to calculate significant association between the datasets. Genes involved in mRNA decay were probed for regulation of decreased transcripts using the Gene Regulatory Network Inference Using Time Series (GRENITS) package in R and the number of links per model, per threshold was evaluated to determine the set probability threshold at  $> 0.4$  for these regulators. For comparison between transcript abundance and histone post-translation modifications, supplementary information was sourced for ChIP-seq or ChIP-chip experiments from the Gene Expression Omnibus (GEO) datasets for H3K56ac, H4K5/8/12ac (72) as well as Salcedo-Amaya *et al.* for H3K9me3 (17), Jiang *et al.* 2014 for H3K36me3 (16) and Flueck *et al.* 2009 and Fraschka *et al.* for HP1 occupancy in *P. falciparum* parasites (46,47). The genes associated with the specific histone marks in each of the publications were then



probed for association with specific clusters of expression using two-tailed Fisher's exact tests and increased presence of the post-translational modification in gametocytes (65). To determine the involvement of ApiAP2 transcription factors in gametocyte development, GRENITS was applied (probability threshold >0.7) using the total transcriptome as possible regulated genes (68). Following the identification of 5 ApiAP2 transcription factors (*ap2-g* was not included in further predictive analysis) with putative regulatory activity, these transcription factors were re-probed as regulators, using genes containing the transcription factor's binding site as possible regulated genes if the binding site had been determined (13). The number of links per model, per threshold was evaluated to determine the set probability threshold for the regulated genes of each transcription factor. The online FIRE algorithm (56) was used to identify enriched regulatory motifs in genes of interest.

## **Data availability**

The microarray data has been submitted to the GEO with accession number GSE104889 ([www.ncbi.nlm.nih.gov/geo/](http://www.ncbi.nlm.nih.gov/geo/)).

## **Author Contributions**

RvB and LMB conceived the study. RvB, LO conducted experiments, HP contributed data, RvW, RvB, JR performed the analyses. RvB, RvW, JN, HP, ML and LMB interpreted results. RvB, ML, LMB wrote the paper with inputs from the other authors. All co-authors approved the final version of the paper.

## **Acknowledgements**

574 The UP ISMC acknowledges the South African Medical Research Council (SA MRC)  
 575 as Collaborating Centre for Malaria Research. This work was supported by the South  
 576 African Research Chairs Initiative of the Department of Science and Technology,  
 577 administered through the South African National Research Foundation (UID 84627)  
 578 and the European Commission 'EviMalar' (no 242095) to LMB.

579

580

## References

1. World Health Organization. World malaria report 2018. 2018. 1-210 p.
2. Josling G, Llinás M. Sexual development in Plasmodium parasites: knowing when it's time to commit. Nat Rev Microbiol. 2015;13(9):573–87.
3. Sinden R. The cell biology of malaria infection of mosquito: Advances and opportunities. Cell Microbiol. 2015;17(4):451–66.
4. Hawking F, Wilson M, Gammage K. Evidence for cyclic development and short-lived maturity in the gametocytes of Plasmodium falciparum. Trans R Soc Trop Med Hyg. 1971;65(5):549–59.
5. Hall N, Karras M, Raine J, Carlton J, Kooij T, Berriman M, et al. A comprehensive survey of the Plasmodium life cycle by genomic, transcriptomic, and proteomic analyses. Science. 2005 Jan 7;307(5706):82–6.
6. Cortés A, Deitsch KW. Malaria epigenetics. Cold Spring Harb Perspect Med. 2017;7(7):1–23.
7. Llinás M, Deitsch KW, Voss TS. Plasmodium gene regulation: far more to factor in. Trends Parasitol. 2008;24(12):551–6.
8. Horrocks P, Wong E, Russell K, Emes RD. Control of gene expression in Plasmodium falciparum - Ten years on. Mol Biochem Parasitol. 2009;164(1):9–25.
9. Cui L, Lindner S, Miao J. Translational regulation during stage transitions in malaria parasites. Ann N Y Acad Sci. 2015;1342(1):1–9.
10. Hughes KR, Philip N, Starnes GL, Taylor S, Waters AP. From cradle to grave : RNA biology in malaria parasites. WIREs RNA. 2010;1:287–303.
11. Bozdech Z, Llinas M, Pulliam BL, Wong ED, Zhu J, Derisi JL. The Transcriptome of the Intraerythrocytic Developmental Cycle of Plasmodium falciparum. PLoS Biol. 2003;1(1):85–100.
12. Le Roch KG, Zhou Y, Blair PL, Grainger M, Moch JK, Haynes JD, et al. Discovery of Gene Function by Expression Profiling of the Malaria Parasite Life Cycle. Science. 2003;301:1503–

608 9.

609 13. Campbell TL, de Silva EK, Olszewski KL, Elemento O, Llinás M. Identification and Genome-  
610 Wide Prediction of DNA Binding Specificities for the ApiAP2 family of regulators from the  
611 malaria parasite. PLoS Pathog. 2010;6(10):1–15.

612 14. Balaji S, Babu MM, Iyer LM, Aravind L. Discovery of the principal specific transcription factors  
613 of Apicomplexa and their implication for the evolution of the AP2-integrase DNA binding  
614 domains. Nucleic Acids Res. 2005;33(13):3994–4006.

615 15. Painter HJ, Campbell TL, Llinas M. The Apicomplexan AP2 family: Integral factors regulating  
616 Plasmodium development. Mol Biochem Parasitol. 2011;176(1):1–7.

617 16. Jiang L, Mu J, Zhang Q, Ni T, Srinivasan P. PfSETvs methylation of histone H3K36 represses  
618 virulence genes in Plasmodium falciparum. Nature. 2014;499(7457):223–7.

619 17. Salcedo-Amaya AM, van Driel MA, Alako BT, Trelle MB, van den Elzen AMG, Cohen AM, et  
620 al. Dynamic histone H3 epigenome marking during the intraerythrocytic cycle of Plasmodium  
621 falciparum. Proc Natl Acad Sci. 2009;106(24):9655–60.

622 18. Painter HJ, Carrasquilla M, Llinás M. Capturing in vivo RNA transcriptional dynamics from the  
623 malaria parasite Plasmodium falciparum. Genome Res. 2017;1–21.

624 19. Painter HJ, Chung NC, Sebastian A, Albert I, Storey JD, Llinás M. Genome-wide real-time in  
625 vivo transcriptional dynamics during Plasmodium falciparum blood-stage development. Nat  
626 Commun. 2018;9(1):2656.

627 20. Brancucci NMB, Gerdt JP, Wang CQ, De Niz M, Philip N, Adapa SR, et al.  
628 Lysophosphatidylcholine Regulates Sexual Stage Differentiation in the Human Malaria  
629 Parasite Plasmodium falciparum. Cell. 2017;171(7):1532–1544.e15.

630 21. Sinha A, Hughes K, Modrzynska K, Otto T, Pfander C, Dickens N, et al. A cascade of DNA-  
631 binding proteins for sexual commitment and development in Plasmodium. Nature.  
632 2014;507:253–61.

633 22. Kafsack BFC, Rovira-Graells N, Clark TG, Bancells C, Crowley VM, Campino SG, et al. A  
634 transcriptional switch underlies commitment to sexual development in malaria parasites.

- 635 Nature. 2014;507:248–54.
- 636 23. Josling GA, Venezia J, Orchard L, Russell TJ, Painter HJ, Llinás M. Regulation of sexual  
637 differentiation is linked to invasion in malaria parasites. bioRxiv. 2019;1–35.
- 638 24. Bancells C, Llorà-batlle O, Poran A, Nötzel C, Rovira-graells N, Elemento O, et al. Revisiting  
639 the initial steps of sexual development in the malaria parasite *Plasmodium falciparum*. Nat  
640 Microbiol. 2019;4:144–54.
- 641 25. Poran A, Nötzel C, Aly O, Mencia-Trinchant N, Harris CT, Guzman ML, et al. Single-cell RNA  
642 sequencing reveals a signature of sexual commitment in malaria parasites. Nature. 2017;1–22.
- 643 26. Kent RS, Modrzynska KK, Cameron R, Philip N. Inducible developmental reprogramming  
644 redefines commitment to sexual development in the malaria parasite *Plasmodium berghei*. Nat  
645 Microbiol. 2019;3(11):1206–13.
- 646 27. Coleman BI, Skillman KM, Jiang RHY, Childs LM, Altenhofen LM, Ganter M, et al. A  
647 *Plasmodium falciparum* Histone Deacetylase regulates antigenic variation and gametocyte  
648 conversion. Cell Host Microbe. 2014;16(2):177–86.
- 649 28. Brancucci NMB, Bertschi NL, Zhu L, Niederwieser I, Chin WH, Wampfler R, et al.  
650 Heterochromatin protein 1 secures survival and transmission of malaria parasites. Cell Host  
651 Microbe. 2014;16(2):165–76.
- 652 29. Filarsky M, Fraschka SA, Niederwieser I, Brancucci NMB, Carrington E, Carrió E, et al. GDV1  
653 induces sexual commitment of malaria parasites by antagonizing HP1-dependent gene  
654 silencing. Science. 2018;359:1259–63.
- 655 30. Modrzynska K, Pfander C, Chappell L, Yu L, Suarez C, Dundas K, et al. A Knockout Screen of  
656 *ApiAP2* Genes Reveals Networks of Interacting Transcriptional Regulators Controlling the  
657 *Plasmodium* Life Cycle. Cell Host Microbe. 2017;21(1):11–22.
- 658 31. Ikadai H, Shaw Saliba K, Kanzok SM, McLean KJ, Tanaka TQ, Cao J, et al. Transposon  
659 mutagenesis identifies genes essential for *Plasmodium falciparum* gametocytogenesis. Proc  
660 Natl Acad Sci. 2013;110(18):E1676–84.
- 661 32. Mair GR, Braks JAM, Garver LS, Dimopoulos G, Hall N, Wiegant JCAG, et al. Translational

662           Repression is essential for Plasmodium sexual development and mediated by a DDX6-type  
663           RNA helicase. *Science*. 2006;42(1):84–94.

664   33.   Miao J, Fan Q, Parker D, Li X, Li J, Cui L. Puf Mediates Translation Repression of  
665           Transmission-Blocking Vaccine Candidates in Malaria Parasites. *PLoS Pathog*. 2013;9(4).

666   34.   Silvestrini F, Bozdech Z, Lanfrancotti A, Di Giulio E, Bultrini E, Picci L, et al. Genome-wide  
667           identification of genes upregulated at the onset of gametocytogenesis in *Plasmodium*  
668           *falciparum*. *Mol Biochem Parasitol*. 2005;143(1):100–10.

669   35.   Lasonder E, Rijpma SR, van Schaijk BCL, Hoeijmakers WAM, Kensche PR, Gresnigt MS, et  
670           al. Integrated transcriptomic and proteomic analyses of *P. falciparum* gametocytes: molecular  
671           insight into sex-specific processes and translational repression. *Nucleic Acids Res*. 2016;1–15.

672   36.   Young JA, Fivelman QL, Blair PL, De P, Le KG, Zhou Y, et al. The *Plasmodium falciparum*  
673           sexual development transcriptome : A microarray analysis using ontology-based pattern  
674           identification. *Mol Biochem Parasitol*. 2005;143:67–79.

675   37.   López-Barragán MJ, Lemieux J, Quiñones M, Williamson KC, Molina-Cruz A, Cui K, et al.  
676           Directional gene expression and antisense transcripts in sexual and asexual stages of  
677           *Plasmodium falciparum*. *BMC Genomics*. 2011;12:587.

678   38.   Lu X, Batugedara G, Lee M, Prudhomme J, Bunnik E, Le Roch K. Nascent RNA sequencing  
679           reveals mechanisms of gene regulation in the human malaria parasite *Plasmodium falciparum*.  
680           *Nucleic Acids Res*. 2017;1–16.

681   39.   Silvestrini F, Lasonder E, Olivieri A, Camarda G, van Schaijk B, Sanchez M, et al. Protein  
682           Export Marks the Early Phase of Gametocytogenesis of the Human Malaria Parasite  
683           *Plasmodium falciparum*. *Mol Cell Proteomics*. 2010;9(7):1437–48.

684   40.   Miao J, Chen Z, Wang Z, Shrestha S, Li X, Li R, et al. Sex-specific proteomes of human  
685           malaria parasite. *Mol Cell Proteomics*. 2017;33(1):1–36.

686   41.   Tao D, Ubaida-Mohien C, Mathias DK, King JG, Pastrana-Mena R, Tripathi A, et al. Sex-  
687           partitioning of the *Plasmodium falciparum* Stage V Gametocyte Proteome Provides Insight into  
688           *falciparum*-specific Cell Biology. *Mol Cell Proteomics*. 2014;13(10):2705–24.

42. Adjalley SH, Johnston GL, Li T, Eastman RT, Ekland EH, Eappen AG. Quantitative assessment of *Plasmodium falciparum* sexual development reveals potent transmission-blocking activity by methylene blue. *PNAS*. 2011;108(47):E1214–23.
43. Meerstein-Kessel L, Van Der Lee R, Stone W, Lanke K, Baker DA, Alano P, et al. Probabilistic data integration identifies reliable gametocyte-specific proteins and transcripts in malaria parasites. *Sci Rep*. 2018;8(1):1–13.
44. Otto TD, Wilinski D, Assefa S, Keane TM, Sarry LR, Böhme U, et al. New insights into the blood-stage transcriptome of *Plasmodium falciparum* using RNA-Seq. *Mol Microbiol*. 2010;76(1):12–24.
45. Tibúrcio M, Silvestrini F, Bertuccini L, Sander AF, Turner L, Lavstsen T, et al. Early gametocytes of the malaria parasite *Plasmodium falciparum* specifically remodel the adhesive properties of infected erythrocyte surface. 2013;15:647–59.
46. Fraschka SA, Filarsky M, Hoo R, Preiser PR, Fraschka SA, Filarsky M, et al. Comparative Heterochromatin Profiling Reveals Conserved and Unique Epigenome Signatures Linked to Adaptation and Development of Malaria Parasites. *Cell Host Microbe*. 2018;1–14.
47. Flueck C, Bartfai R, Volz J, Niederwieser I, Salcedo-Amaya AM, Alako BTF, et al. *Plasmodium falciparum* heterochromatin protein 1 marks genomic loci linked to phenotypic variation of exported virulence factors. *PLoS Pathog*. 2009;5(9):1-16.
48. Macrae JI, Dixon MWA, Dearnley MK, Chua HH, Chambers JM, Kenny S, et al. Mitochondrial metabolism of sexual and asexual blood stages of the malaria parasite *Plasmodium falciparum*. *BMC Biol*. 2013;11:67–76.
49. Lamour SD, Straschil U, Saric J, Delves MJ. Changes in metabolic phenotypes of *Plasmodium falciparum* in vitro cultures during gametocyte development. *Malar J*. 2014;13(468):1–10.
50. Tiburcio M, Niang M, Deplaine G, Perrot S, Bischoff E, Ndour PA, et al. A switch in infected erythrocyte deformability at the maturation and blood circulation of *Plasmodium falciparum* transmission stages. *Blood*. 2012;119(24):172–81.
51. Collins CR, Hackett F, Atid J, Ser M, Tan Y, Blackman J. The *Plasmodium falciparum*

716 pseudoprotease SERA5 regulates the kinetics and efficiency of malaria parasite egress from  
717 host erythrocytes. PLoS Pathog. 2017;1–32.

718 52. Miller SK, Good RT, Drew DR, Delorenzi M, Sanders PR, Hodder AN, et al. A subset of  
719 Plasmodium falciparum SERA genes are expressed and appear to play an important role in  
720 the erythrocytic cycle. J Biol Chem. 2002;277(49):47524–32.

721 53. Mancio-Silva L, Lopez-Rubio JJ, Claes A, Scherf A. Sir2a regulates rDNA transcription and  
722 multiplication rate in the human malaria parasite Plasmodium falciparum. Nat Commun.  
723 2013;4:1–6.

724 54. Van Biljon R, Niemand J, Van Wyk R, Clark K, Verlinden B, Abrie C, et al. Inducing controlled  
725 cell cycle arrest and re-entry during asexual proliferation of Plasmodium falciparum malaria  
726 parasites. Sci Rep. 2018;8(16581):1–14.

727 55. Garcia CRS, Azevedo MF De, Wunderlich G, Budu A, Young JA, Bannister L. Plasmodium in  
728 the Postgenomic Era : New Insights into the Molecular Cell Biology of Malaria Parasites. Int  
729 Rev Cell Mol Biol. 2008;266(07):85–156.

730 56. Elemento O, Slonim N, Tavazoie S. A Universal Framework for Regulatory Element Discovery  
731 across All Genomes and Data Types. Mol Cell. 2007;28(2):337–50.

732 57. Russell K, Emes R, Horrocks P. Triaging informative cis -regulatory elements for the  
733 combinatorial control of temporal gene expression during Plasmodium falciparum  
734 intraerythrocytic development. Parasit Vectors. 2015;1–9.

735 58. Silvestrini F, Alano P, Williams JL. Commitment to the production of male and female  
736 gametocytes in the human malaria parasite Plasmodium falciparum. Parasitology. University of  
737 Pretoria; 2000;121(2000):465–71.

738 59. Alano P, Billker O. Gametocytes and gametes. Molecular Approaches to Malaria. 2005. 191-  
739 219.

740 60. Smith T, Lourenco P, Carter R, Walliker D, Ranford-Cartwright L. Commitment to sexual  
741 differentiation in the human malaria parasite, Plasmodium falciparum. Parasitology.  
742 2000;(121):127–33.



61. Schwank S, Sutherland CJ, Drakeley CJ. Promiscuous Expression of a -Tubulin II in Maturing Male and Female Plasmodium falciparum Gametocytes. PLoS One. 2010;5(12):1–7.
62. Severini C, Silvestrini F, Sannella A, Barca S, Gradoni L, Alano P, et al. The production of the osmiophilic body protein Pfg377 is associated with stage of maturation and sex in Plasmodium falciparum gametocytes. Mol Biochem Parasitol. 1999;100:247–52.
63. Walzer KA, Kubicki DM, Tang X, Chi J-TA. Single-Cell Analysis Reveals Distinct Gene Expression and Heterogeneity in Male and Female. mSphere. 2018;1–18.
64. Meerstein-Kessel L, Andolina C, Carrio E, Mahamar A, Sawa P, Diawara H, et al. A multiplex assay for the sensitive detection and quantification of male and female Plasmodium falciparum gametocytes. Malar J. BioMed Central; 2018;1–11.
65. Coetzee N, Sidoli S, van Biljon R, Painter H, Llinás M, Garcia BA, et al. Quantitative chromatin proteomics reveals a dynamic histone post-translational modification landscape that defines asexual and sexual Plasmodium falciparum parasites. Sci Rep. 2017;7(1):1–12.
66. Ginsburg H. Progress in in silico functional genomics : the malaria Metabolic Pathways database. Trends Parasitol. 2006;22(6):238–40.
67. Sebastian S, Brochet M, Collins MO, Schwach F, Jones ML, Goulding D, et al. A Plasmodium Calcium-Dependent Protein Kinase Controls Zygote Development and Transmission by Translationally Activating Repressed mRNAs. Cell Host Microbe. 2012;12(1):9–19.
68. Morrissey E. GRENITS: Gene Regulatory Network Inference Using Time Series. R package version 1.24.0. 2012.
69. Zhang C, Li Z, Cui H, Jiang Y, Yang Z, Wang X, et al. Systematic CRISPR-Cas9-Mediated Modifications of Plasmodium yoelii ApiAP2 Genes Reveal Functional Insights into Parasite Development. MBio. 2017;8(6):1–17.
70. Reader J, Botha M, Theron A, Lauterbach SB, Rossouw C, Engelbrecht D, et al. Nowhere to hide: interrogating different metabolic parameters of Plasmodium falciparum gametocytes in a transmission blocking drug discovery pipeline towards malaria elimination. Malar J. 2015;14(1):1–17.

71. Kafsack BF, Painter HJ, Llinas M. New Agilent platform DNA microarrays for transcriptome analysis of Plasmodium falciparum and Plasmodium berghei for the malaria research community. Malar J. 2012;11(1):187.
72. Gupta AP, Chin WH, Zhu L, Mok S, Luah YH, Lim EH, et al. Dynamic Epigenetic Regulation of Gene Expression during the Life Cycle of Malaria Parasite Plasmodium falciparum. PLoS Pathog. 2013;9(2).
73. Karmodiya K, Pradhan SJ, Joshi B, Jangid R, Reddy PC, Galande S. A comprehensive epigenome map of Plasmodium falciparum reveals unique mechanisms of transcriptional regulation and identifies H3K36me2 as a global mark of gene suppression. Epigenetics Chromatin. BioMed Central; 2015;8(1):32.

## Figure Legends

### **Fig 1: The developmental and associated transcriptomic profile of *P. falciparum***

#### **NF54 gametocytes from commitment to maturity. (A)** Sampling and culturing

strategy and stage distribution of parasites on each day of the time course. Colored

lines indicate the presence of specific stages at different time points. Abbreviations

indicate parasitemia (P) and hematocrit (HC) at induction, \* indicate the addition of N-

acetyl glucosamine (NAG) or 5% D-sorbitol. Parasite drawings were modified from

freely available images (<https://smart.servier.com/>), under a Creative Commons

Attribution 3.0 Unported Licence. **(B)** Morphological development was monitored from

induction (day -2) over 16 days of development using Giemsa-stained thin-smear

microscopy. The stage distribution for each day was calculated by counting  $\geq 100$

parasites on each day of monitoring. Legend: I-V indicates different stages of

gametocyte development, R=ring and T=trophozoite stage asexual parasites. **(C)**

Pearson correlation coefficients of the total transcriptomes obtained for each day of

development. Red boxes indicate localized phases of increased correlation. **(D)**

Expression of “gold standard” asexual and gametocyte genes (43) are shown for the

gametocyte time course in heatmaps. **(A-D)** Area plot designates the timing of

appearance and abundance of specific stages throughout the time course.

### **Fig 2: Distinct clusters of expression link to biological development of the *P.***

***falciparum* gametocyte.** Clusters of genes expressed during gametocyte

development following K10 clustering of the total transcriptome. **(A)** The 10 clusters

were grouped into phases of decreased, maintained, increased or developmentally

regulated transcript abundance with number of transcripts per cluster indicated in

brackets and genes of interest from specific clusters highlighted next to heatmaps.

Area plot designates the timing of appearance and abundance of specific stages

throughout the time course. **(B)** Biological processes of interest were selected from GO enrichment (S1 Table) of each of the clusters ( $P < 0.05$ ) with the number of genes related to these functions shown for the groups of clusters in bar graphs with generic descriptions of the gene sets used to describe their function.

**Fig 3: Commitment and development are distinctly regulated processes. (A)** The genes increased in expression during commitment (18,20,25) were compared to transcripts increased in abundance during gametocytogenesis (Clusters 6-10, 2425 transcripts) with overlapping genes of interest: *sap18* (pf3d7\_0711400), *sir2a* (pf3d7\_1328800) and genes only increased during commitment *gdv1* (pf3d7\_0935400), *iswi* (pf3d7\_0624600), *sn2fl* (pf3d7\_1104200) highlighted in heatmaps. **(B)** The 2429 genes expressed during gametocytogenesis also contained significantly enriched regulatory 5' motifs identified using the FIRE algorithm (56).

**Fig 4: Stage-specific increases in gene expression contribute to the extended differentiation of *P. falciparum* gametocytes. (A)** During stage I-III of development genes in cluster 8 sharply increased in expression (indicated with dotted line) with the abundance of these transcripts indicated by ribbon plot with mean $\pm$ SD. GO enrichment of genes involved in regulation of transcription (GO:0010468, 11 transcripts,  $P = 0.029$ ) is present in this cluster, with presence of protein for these genes in stage I/II and V indicated in black (35,39–41) and the corresponding Interpro domains (<https://www.ebi.ac.uk/interpro/>) of proteins with unknown function indicated on the right. **(B)** The timing of sexually dimorphic transcript profiles (35) are shown in line graphs while the association of male-and female-enriched transcripts with specific clusters (6-10) are shown as standardized residuals and significance of these

associations indicated ( $P < 0.05^*$ ,  $0.001^{**}$ ,  $0.0001^{***}$ , Fisher's exact test). Genes of interest for each sex are highlighted in heatmaps next to male and female symbols. **(C)** The genes expressed during maturation (cluster 10) showed a significant association ( $P < 0.0001$ , two-tailed Fisher's exact test) with genes stabilized post-transcriptionally during commitment (18) and H3K36me3-associated genes in asexual development (16,73) before a sharp increase at stage IV-V of development (dashed line). Blocks indicate the timing of stabilization of the transcripts (18) or abundance of the H3K36me3 mark (65) and the overlap between the 3 datasets are indicated in the Venn diagram. Genes of interest within the three functional datasets are highlighted in heatmap. **(A-C)** Area plot designates the timing of appearance and abundance of specific stages throughout the time course.

**Fig 5: ApiAP2 transcription factors act as regulatory elements during gametocytogenesis.** **(A)** ApiAP2 transcription factors increased in transcript abundance during gametocytogenesis were evaluated for their expression throughout gametocyte development with blocks indicating periods of increased abundance. Area plot designates the timing of appearance and abundance of specific stages throughout the time course. **(B)** The transcription factors were also probed for regulatory activity using coexpression analysis by GRENITS. Transcription factors with known binding sites (13), were probed against genes containing the transcription factor binding sites indicated or the total transcriptome if their binding site was unknown. The targets of each transcription factor are shown by shaded ribbons, with correlated transcripts indicated in red and anticorrelated transcripts indicated in blue. Generic functional terms describing enriched gene ontology terms or individual gene products are indicated in red (increased transcripts) or blue (decreased transcripts).

**Fig 6: Molecular model of regulatory modules that shape cellular differentiation during gametocytogenesis.** Specific regulatory events are mapped out over the extended gametocyte development of *P. falciparum* parasites. Molecular regulators are highlighted in red while specific events or epigenetic marks are shown in black. Colored blocks indicate the span of specific phases of transcript abundance, with dotted lines indicating transition points in gametocyte development and grey triangles indicate the timing of repressive mechanisms in gametocyte development. Parasite drawings were modified from freely available images (<https://smart.servier.com/>), under a Creative Commons Attribution 3.0 Unported Licence.

# **Supporting information captions**

**S1 Fig. Transcript abundance of ApiAP2 transcription factors during *P. falciparum* gametocyte development**

**S2 Fig. Transcript abundance of *ap2-g* and downstream genes (identified in Josling *et al.* 2019)**

**S1 Table. Total microarray data with GO enrichment pertaining to Figure 1,2**

**S2 Table. Correlation of microarray time points and gametocyte markers pertaining to Figure 1**

**S3 Table. Cross-dataset comparison and functional enrichment pertaining to Figures 3-5**











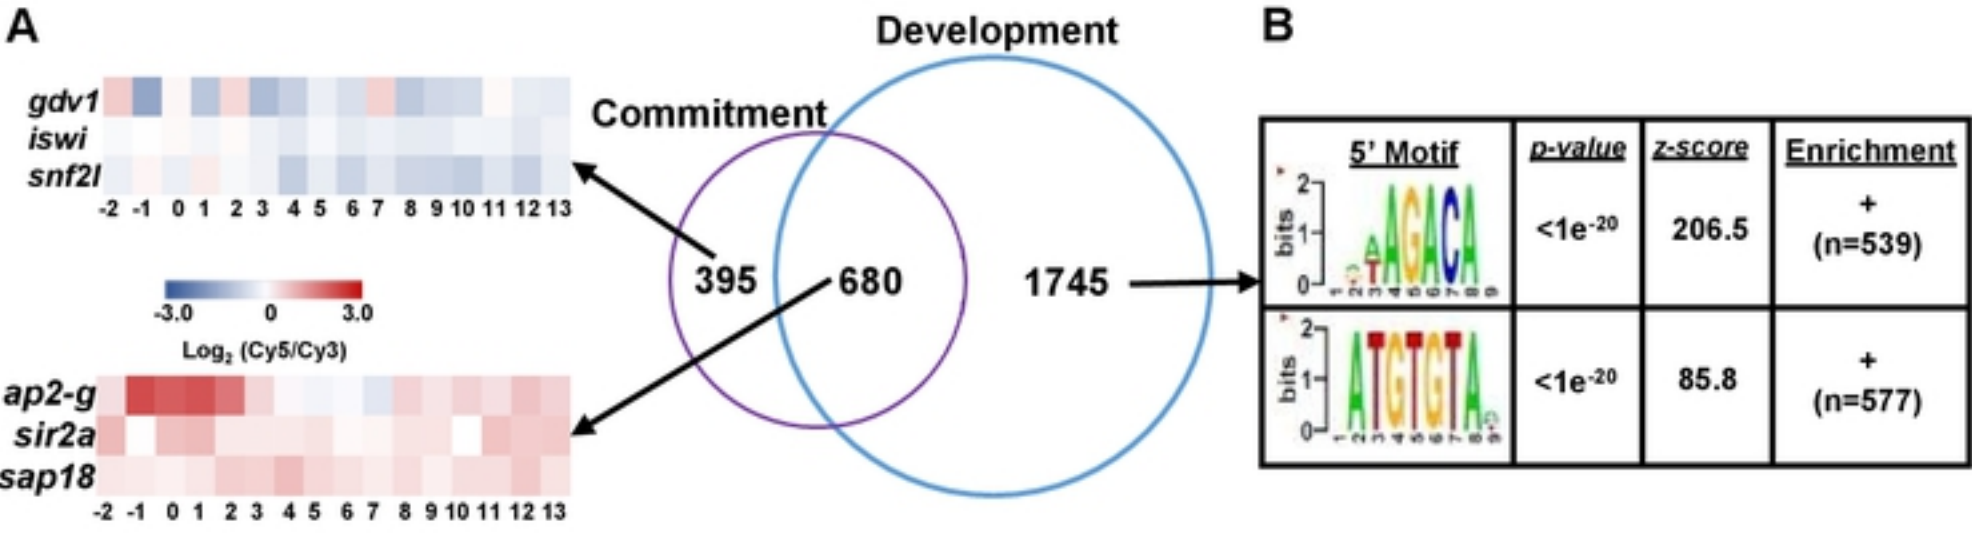

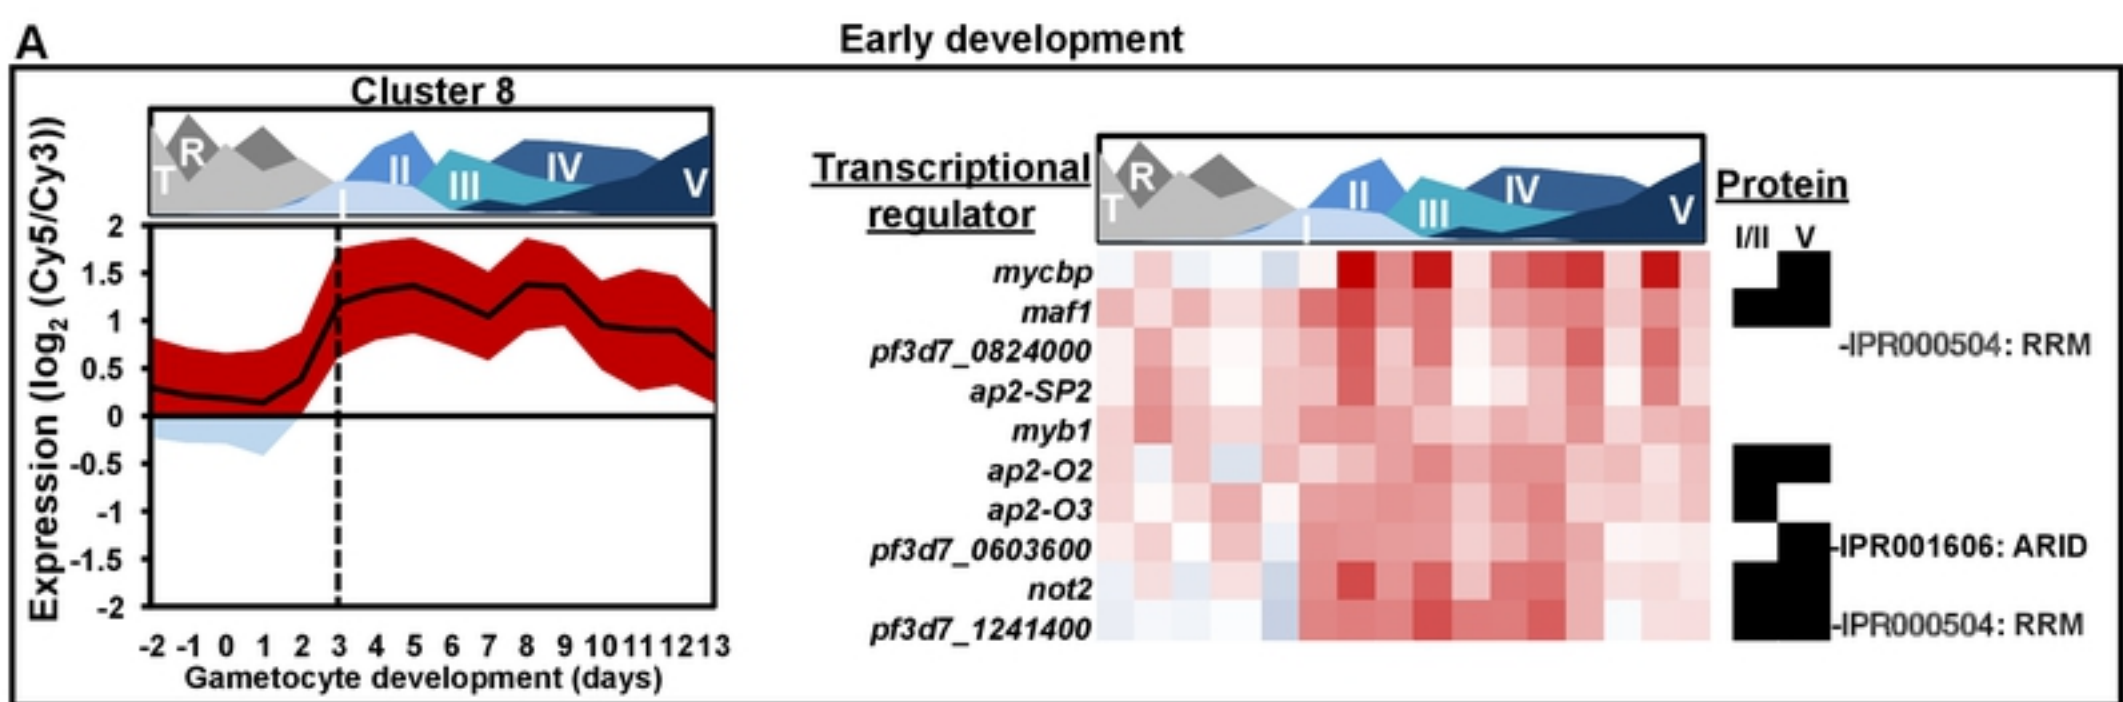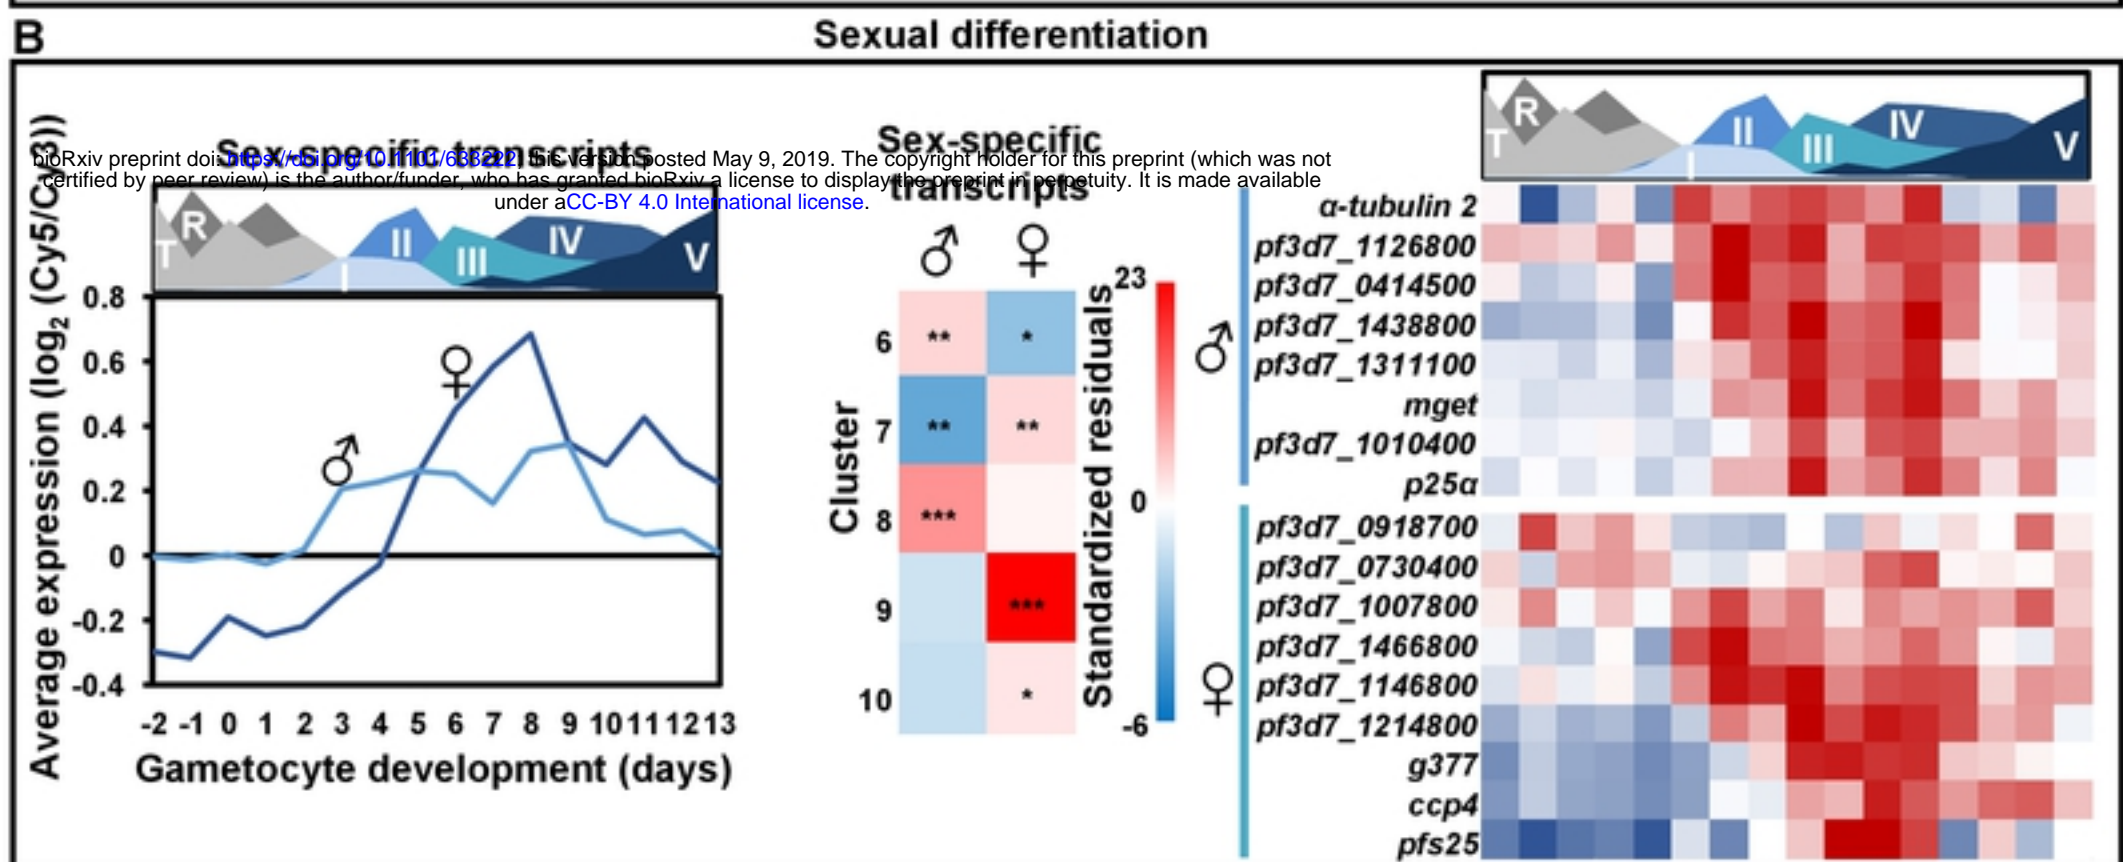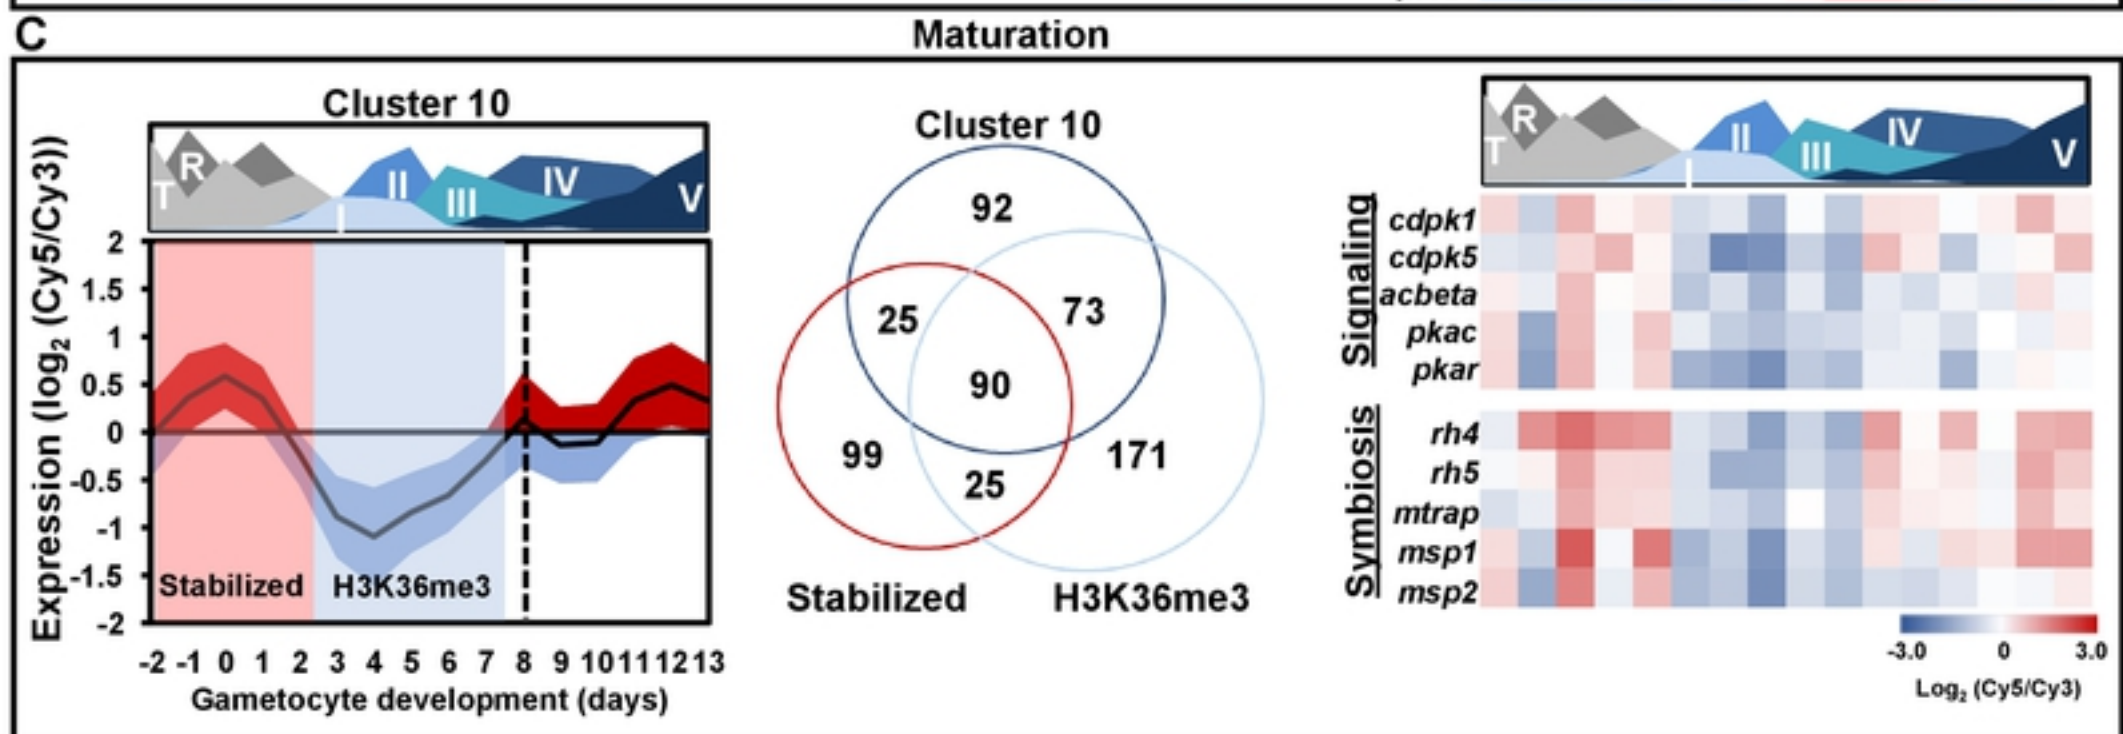

A

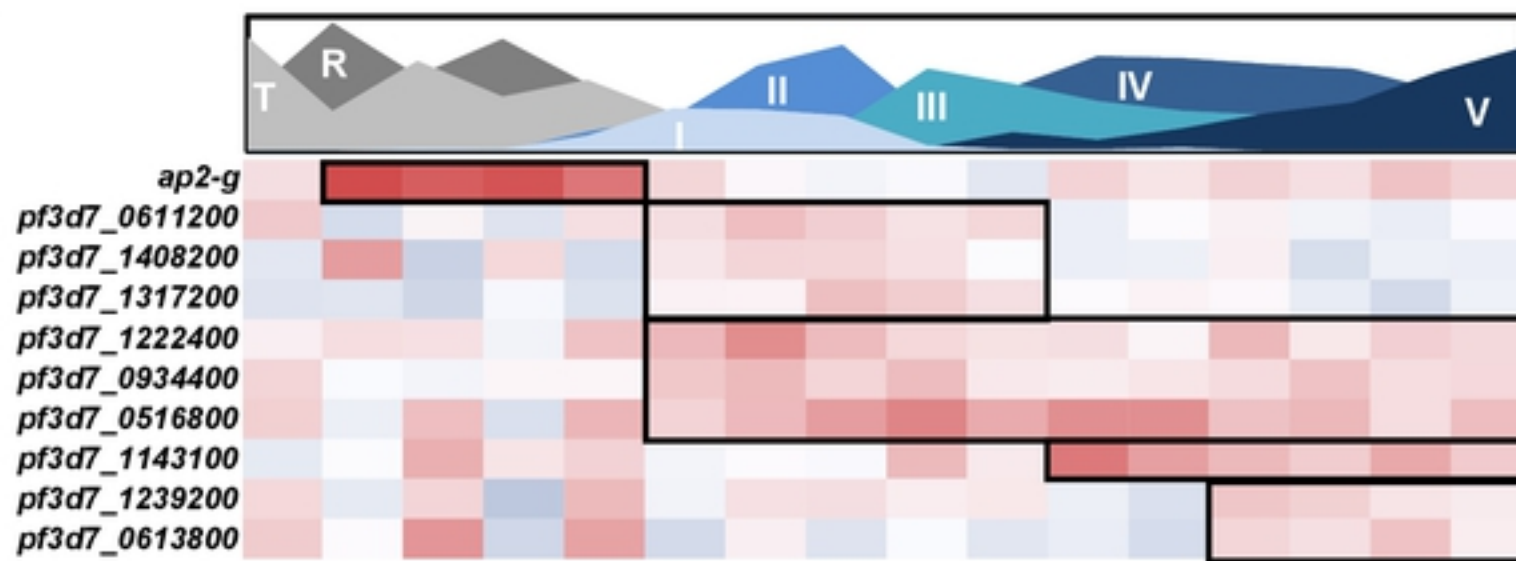

B

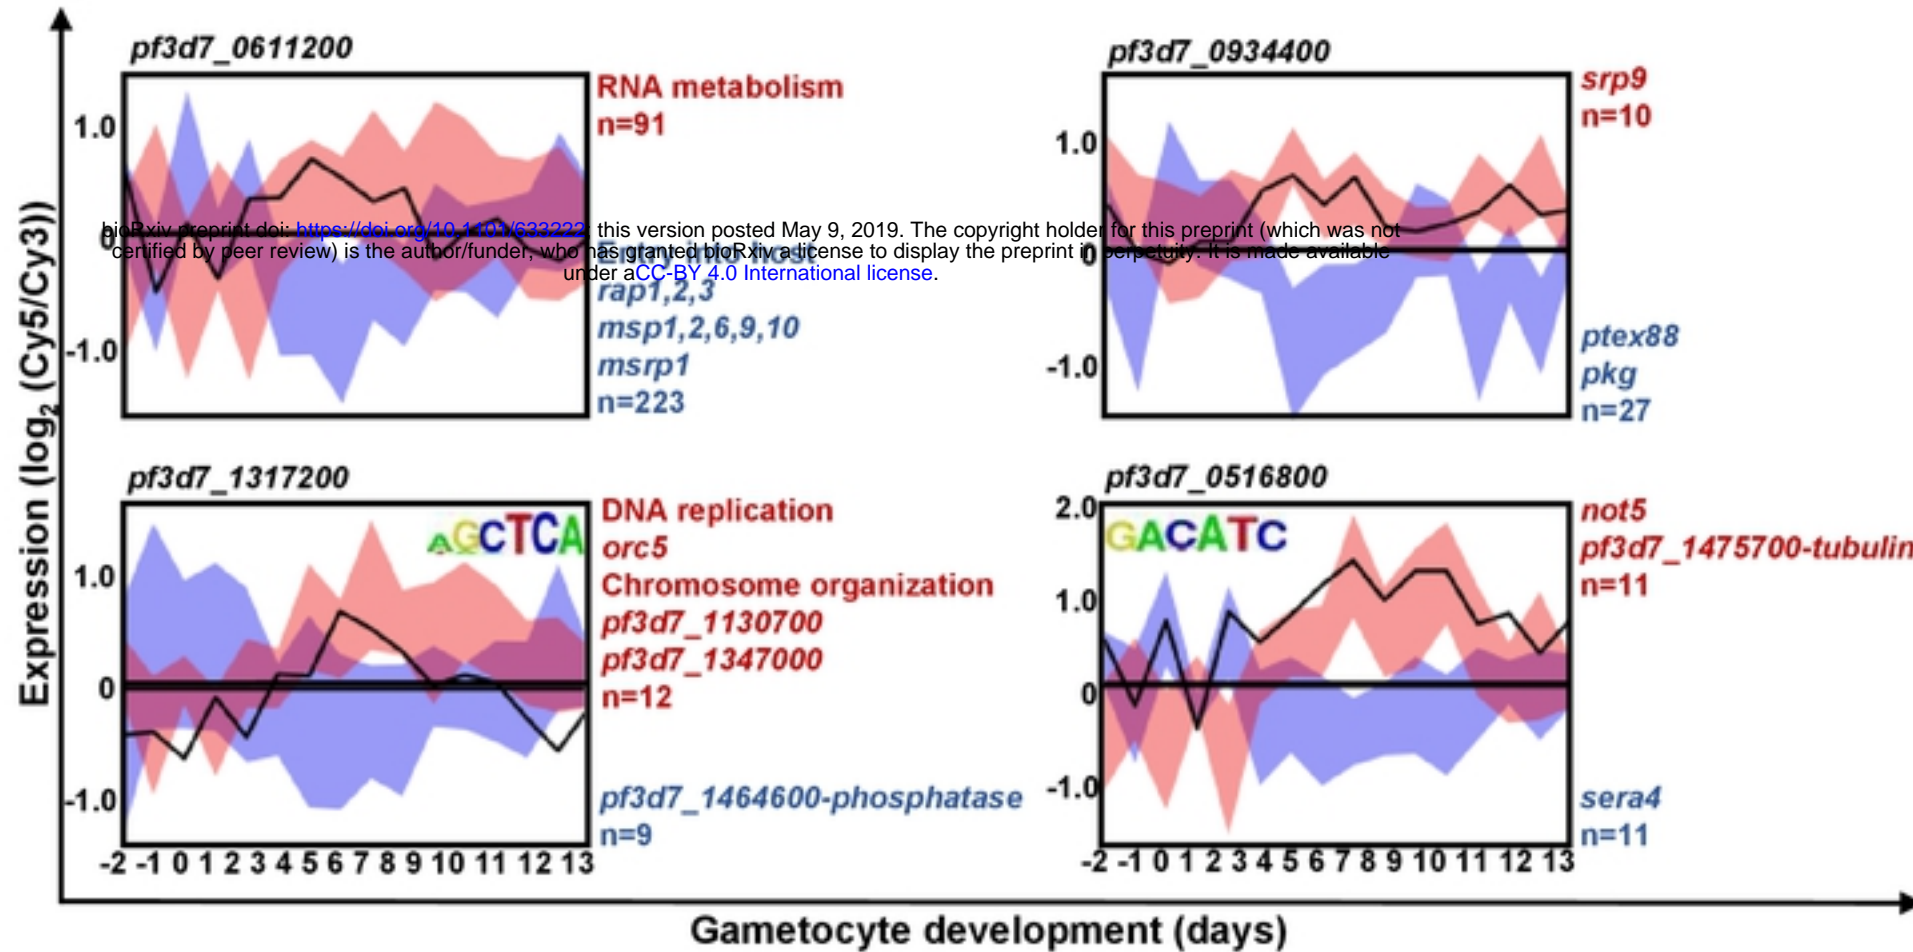

bioRxiv preprint doi: <https://doi.org/10.1101/633222>; this version posted May 9, 2019. The copyright holder for this preprint (which was not certified by peer review) is the author/funder, who has granted bioRxiv a license to display the preprint in perpetuity. It is made available under aCC-BY 4.0 International license.



# Gametocytogenesis

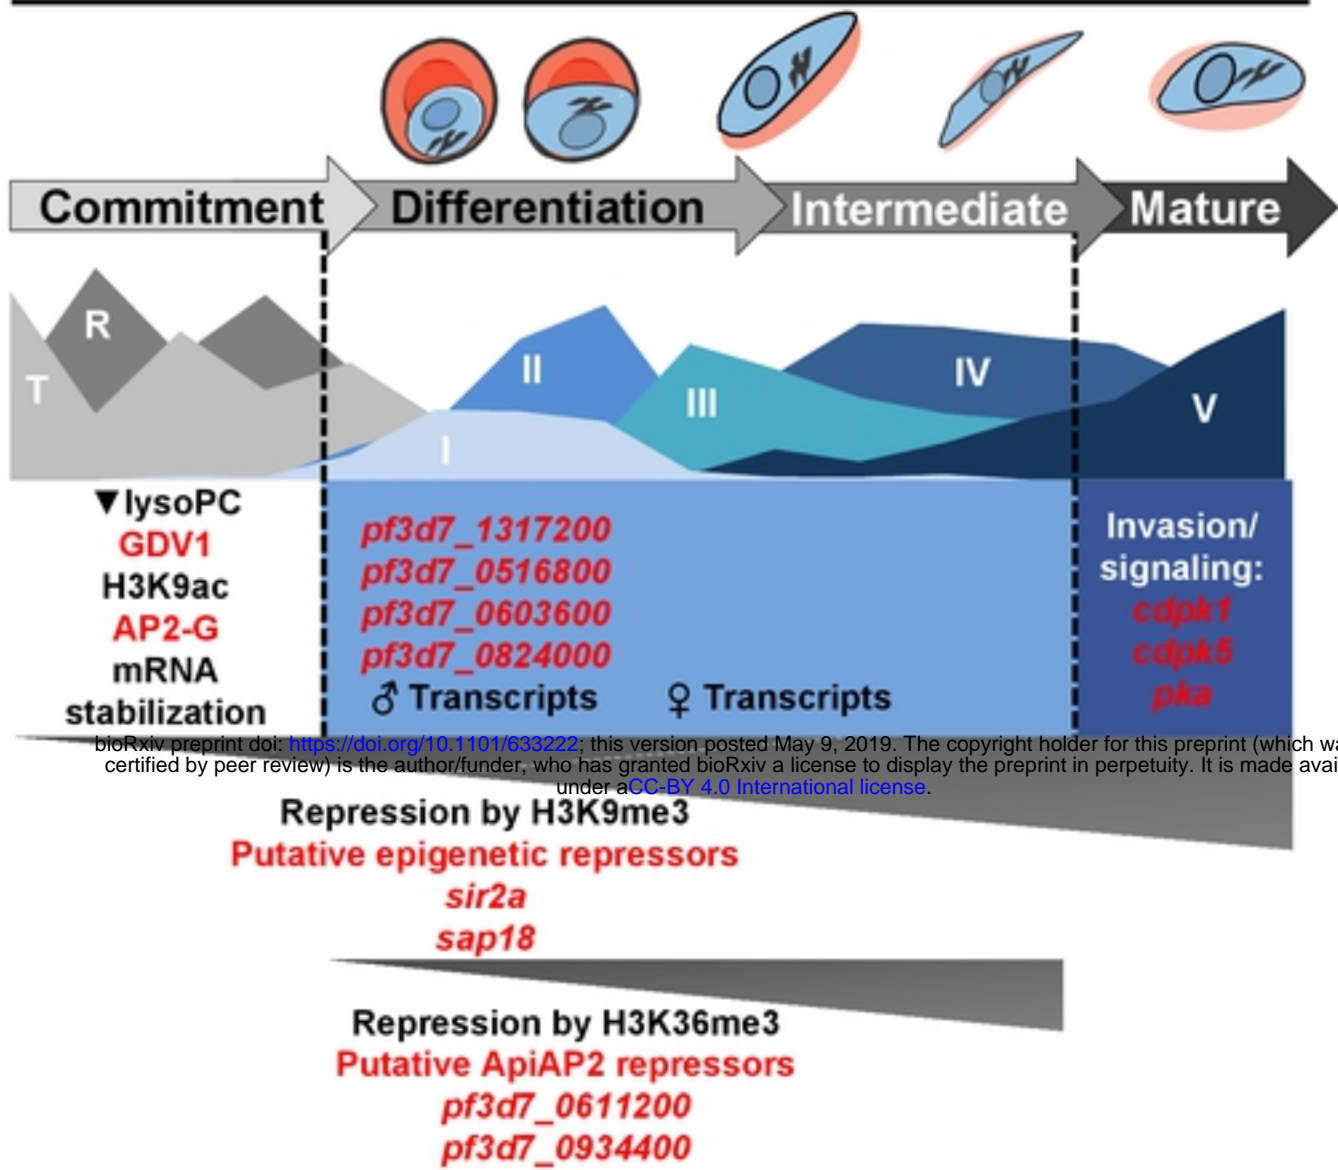

bioRxiv preprint doi: <https://doi.org/10.1101/633222>; this version posted May 9, 2019. The copyright holder for this preprint (which was not certified by peer review) is the author/funder, who has granted bioRxiv a license to display the preprint in perpetuity. It is made available under aCC-BY 4.0 International license.
